# Supplementary material for: Recognition of galactose by a scaffold protein recruits a transcriptional activator for the GAL regulon induction in Candida albicans
Source: eLife. 2023 Feb 1;12:e84155. doi: 10.7554/eLife.84155 (PMC9925049; doi:10.7554/eLife.84155)
Supplement: Figure 1—figure supplement 2—source data 1. [file elife-84155-fig1-figsupp2-data1.xlsx]

## Sheet: Fig S2B
Left
		Column	REP1	REP2	REP3	SD		Comparisons	p value (two-tailed Student’s t-test, unpaired)
	WT	A	16.1113	15.5625	16.4498	0.447803		Column A VS C		0.9375
	rep1	B	2.73208	2.58471	2.31338	0.212388		Column A VS D		0.9351
	cph1	C	17.6305	15.0324	15.2422	1.44327		Column A VS E		0.9348
	rtg1	D	16.9123	16.1113	15.2422	0.835271
	rtg3	E	14.0257	17.2676	16.5642	1.70535
Right
		Column	REP1	REP2	REP3	SD		Comparisons	p value (two-tailed Student’s t-test, unpaired)
	WT	F	14.9285	14.3204	15.3482	0.516786		Column F VS H		0.6508
	rep1	G	2.94854	2.62079	2.49666	0.23346		Column F VS I		0.7947
	cph1	H	15.5625	14.5203	15.1369	0.523995		Column F VS J		0.742
	rtg1	I	14.2215	15.1369	15.6707	0.732947
	rtg3	J	14.9285	14.6213	15.455	0.421616

## Sheet: Fig S2C
Left
		Gal							Gly
		Column	REP1	REP2	REP3	SD			Column	REP1	REP2	REP3	SD
	WT	A	19.4271	11.6318	9.44794	5.24596		WT	D	18.3792	13.3614	8.75435	4.81387
	rtg1	B	12.2101	18.2522	9.25351	4.58668		rtg1	E	9.06307	11.9588	16.5642	3.78292
	rtg3	C	17.8766	10.9283	9.91766	4.33291		rtg3	F	15.6707	12.3805	9.38268	3.14515
							Comparisons	p value (two-tailed Student’s t-test, unpaired)
							Column A VS B		0.9509
							Column A VS C		0.887
							Column D VS E		0.7974
							Column D VS F		0.7739
Right
		Gal							Gly
		Column	REP1	REP2	REP3	SD			Column	REP1	REP2	REP3	SD
	WT	G	9.71356	6.32033	7.21	1.75942		WT	J	0.646176	0.864537	0.817902	0.114997
	rtg1	H	8.87656	7.94474	6.6807	1.10211		rtg1	K	0.550953	0.823591	0.697372	0.136444
	rtg3	I	9.06307	7.56846	6.54322	1.26719		rtg3	L	1.1487	0.972655	0.742262	0.203823
							Comparisons	p value (two-tailed Student’s t-test, unpaired)
							Column G VS H		0.9462
							Column G VS I		0.9862
							Column J VS K		0.4529
							Column J VS L		0.2573
