# Supplementary material for: Recognition of galactose by a scaffold protein recruits a transcriptional activator for the GAL regulon induction in Candida albicans
Source: eLife. 2023 Feb 1;12:e84155. doi: 10.7554/eLife.84155 (PMC9925049; doi:10.7554/eLife.84155)
Supplement: Figure 1—source data 1. [file elife-84155-fig1-data1.xlsx]

## Sheet: Fig 1B
Left
		WT					rep1					rep1+Rep1
		Column	REP1	REP2	REP3	SD	Column	REP1	REP2	REP3	SD	Column	REP1	REP2	REP3	SD
	Glu	A	0.0537	0.0825	0.0552	0.016212	D	0.1088	0.1096	0.1233	0.00815046	G	0.042689	0.025916	0.06164	0.0178731
	Gal	B	13.269	12.21	14.123	0.958329	E	1.7053	1.2397	1.2746	0.259327	H	10.5561	7.58873	11.8171	2.17082
	Gly	C	0.2793	0.2466	0.2382	0.0217143	F	1.7053	1.1487	1.3104	0.286326	I	0.400535	0.183011	0.420448	0.131713
								Comparisons	p value (two-tailed Student’s t-test, unpaired)
								Column B VS E		3.3e-05
								Column H VS E		0.0024
								Column C VS F		0.0027
								Column I VS F		0.0044
Right
		WT					rep1					rep1+Rep1
		Column	REP1	REP2	REP3	SD	Column	REP1	REP2	REP3	SD	Column	REP1	REP2	REP3	SD
	Glu	J	0.0176	0.0256	0.0276	0.0052915	M	0.1119	0.1088	0.1166	0.00392726	P	0.02683	0.057114	0.023035	0.0186766
	Gal	K	9.849	11.632	9.918	1.01009	N	1.2834	1.2142	1.3013	0.045999	Q	7.58873	8.63383	6.81589	0.91236
	Gly	L	0.119	0.113	0.0974	0.0111499	O	1.3947	1.1892	1.6358	0.223536	R	0.258816	0.50698	0.228458	0.152797
								Comparisons	p value (two-tailed Student’s t-test, unpaired)
								Column K VS N		9.47e-05
								Column Q VS N		0.0003
								Column L VS O		0.0006
								Column R VS O		0.0023

## Sheet: Fig 1D
Left
		Column	REP1	REP2	REP3	SD		Comparisons	p value (two-tailed Student’s t-test, unpaired)
	Rep1	A	7.2535	8.1261	7.5137	0.44799		Column A VS G		1.28e-05
	AD	B	1.2656	0.9356	0.9728	0.180746		Column E VS G		0.0005
	BD	C	0.6417	0.732	0.7631	0.0630598
	C	D	1.1173	0.9854	0.9138	0.103228
	Rep1ΔAD	E	6.4086	7.1107	5.278	0.924661
	Rep1ΔC	F	1.1329	1.2658	1.1408	0.074554
	Vector	G	0.8645	0.7684	0.712	0.0771064
Right
		Column	REP1	REP2	REP3	SD		Comparisons	p value (two-tailed Student’s t-test, unpaired)
	Rep1	H	5.21	5.8354	6.21	0.505215		Column H VS N		6.77e-05
	AD	I	0.933	0.9013	0.79	0.0751017		Column L VS N		1.55e-05
	BD	J	0.4796	0.5586	0.5434	0.0419175
	C	K	0.6783	0.6029	0.5548	0.0622509
	Rep1ΔAD	L	4.4383	4.8906	4.4383	0.261136
	Rep1ΔC	M	0.895	0.6071	1.3013	0.348779
	Vector	N	0.7792	0.667	0.6417	0.0731838
