# Supplementary material for: Recognition of galactose by a scaffold protein recruits a transcriptional activator for the GAL regulon induction in Candida albicans
Source: eLife. 2023 Feb 1;12:e84155. doi: 10.7554/eLife.84155 (PMC9925049; doi:10.7554/eLife.84155)
Supplement: Figure 2—source data 1. [file elife-84155-fig2-data1.xlsx]

## Sheet: Figure2 A
	Column	REP1	REP2	REP3	SD			Comparisons	p value (two-tailed Student’s t-test, unpaired)
Glu	A	8.28212	7.3615	8.05564	0.479698			Column A VS B		0.1509
Gal	B	8.39773	13.5479	9.98664	2.63729			Column C VS B		0.8197
Gly	C	16.1113	7.6211	10.3388	4.33572

## Sheet: Figure2 G
Left
		Column	REP1	REP2	REP3	SD		Comparisons	p value (two-tailed Student’s t-test, unpaired)
	REP1ΔAD	A	23.4254	22.4711	20.8215	1.31734		Column A VS C		3.26e-05
	Y526A	B	3.20428	3.20428	2.39496	0.467263		Column B VS C		0.1176
	Vector	C	4.05584	2.49666	3.91768	0.863078
Right
		Column	REP1	REP2	REP3	SD		Comparisons	p value (two-tailed Student’s t-test, unpaired)
	REP1ΔAD	D	21.4068	16.5642	15.2422	3.24554		Column D VS F		0.0021
	Y526A	E	3.97237	3.55537	2.12874	0.966793		Column E VS F		0.3824
	Vector	F	4.34694	4.65893	4.11245	0.274154
