# Supplementary material for: Recognition of galactose by a scaffold protein recruits a transcriptional activator for the GAL regulon induction in Candida albicans
Source: eLife. 2023 Feb 1;12:e84155. doi: 10.7554/eLife.84155 (PMC9925049; doi:10.7554/eLife.84155)
Supplement: Figure 3—figure supplement 1—source data 1. [file elife-84155-fig3-figsupp1-data1.xlsx]

## Sheet: Figure 3-figure supplement 1 A
	Column	REP1	REP2	REP3	SD		Comparisons	p value (two-tailed Student’s t-test, unpaired)
Gal	A	0.0967228	0.103665	0.098073	0.00368071		Column A VS B		0.0544
Glu	B	0.115023	0.123279	0.151774	0.019282

## Sheet: Figure 3-figure supplement 1 D
Left
	Column	REP1	REP2	REP3	SD		Comparisons	p value (two-tailed Student’s t-test, unpaired)
WT	A	18.507	12.6407	18.0009	3.25071		Column A VS B	0.7309
orf19.1772	B	17.3878	12.2101	16.7955	2.83388		Column A VS C	0.7634
orf19.2265	C	17.3878	17.2676	16.3362	0.575593
Right
	Column	REP1	REP2	REP3	SD		Comparisons	p value (two-tailed Student’s t-test, unpaired)
WT	D	16.3362	10.8528	16.4498	3.19913		Column D VS E	0.8427
orf19.1772	E	15.2422	13.4543	16.2233	1.40395		Column D VS F	0.8462
orf19.2265	F	12.6407	15.1369	14.6213	1.31783
