# Supplementary material for: Recognition of galactose by a scaffold protein recruits a transcriptional activator for the GAL regulon induction in Candida albicans
Source: eLife. 2023 Feb 1;12:e84155. doi: 10.7554/eLife.84155 (PMC9925049; doi:10.7554/eLife.84155)
Supplement: Figure 3—source data 1. [file elife-84155-fig3-data1.xlsx]

## Sheet: Fig 3A
	Column	REP1	REP2	REP3	SD			Comparisons	p value (two-tailed Student’s t-test, unpaired)
LexA	A	67.8611	70.1944	70	1.29467			Column A VS B		0.0036
LexA-Rep1	B	56.5185	59.8025	61.5309	2.54608			Column A VS C		1.72e-07
LexA-Cga1	C	166.444	169.556	166.444	1.79625			Column A VS D		0.0003
LexA-Ndt80	D	224.311	185.422	215.289	20.3542

## Sheet: Fig 3E
Left
		WT					cga1					rep1
		Column	REP1	REP2	REP3	SD	Column	REP1	REP2	REP3	SD	Column	REP1	REP2	REP3	SD
	Glu	A	0.038473	0.031467	0.033032	0.00367736	D	0.011049	0.013322	0.013048	0.00124081	G	0.054034	0.055939	0.081334	0.0152415
	Gal	B	12.295	13.5479	13.3614	0.675996	E	0.553553	0.68971	0.693116	0.0796117	H	0.712025	0.864537	0.721965	0.0853283
	Gly	C	0.281265	0.316439	0.325335	0.0233042	F	0.293116	0.363294	0.482968	0.0959953	I	0.992555	0.93728	0.826986	0.0842943
							Comparisons	p value (two-tailed Student’s t-test, unpaired)
							Column B VS E		5.96e-06
							Column H VS E		0.1477
							Column C VS I		0.0003
Right
		WT					cga1					rep1
		Column	REP1	REP2	REP3	SD	Column	REP1	REP2	REP3	SD	Column	REP1	REP2	REP3	SD
	Glu	J	0.034435	0.026096	0.025916	0.00486732	M	0.033493	0.044502	0.036398	0.00570543	P	0.047696	0.042689	0.068869	0.013897
	Gal	K	8.63383	8.33973	8.45614	0.14811	N	0.46313	0.535088	0.606642	0.0717561	Q	0.395021	0.554785	0.619854	0.115692
	Gly	L	0.231647	0.25349	0.233258	0.0121727	O	0.258644	0.317632	0.374349	0.0578562	R	0.939614	0.873029	0.932185	0.0364879
							Comparisons	p value (two-tailed Student’s t-test, unpaired)
							Column K VS N		1.22e-07
							Column Q VS N		0.8886
							Column L VS R		6.96e-06

## Sheet: Fig 3G
		WT							rep1
		Column	REP1	REP2	REP3	SD			Column	REP1	REP2	REP3	SD
	Gal	A	3.94493	8.69388	6.27667	2.3746		Gal	D	0.435275	0.933033	0.659754	0.249277
	Glu	B	0.870551	1.33793	1.71713	0.424055
	Gly	C	0.420448	0.876606	0.447513	0.255908
									Comparisons	p value (two-tailed Student’s t-test, unpaired)
									Column A VS B		0.023
									Column A VS C		0.0143
									Column A VS D		0.151
