# Supplementary material for: Recognition of galactose by a scaffold protein recruits a transcriptional activator for the GAL regulon induction in Candida albicans
Source: eLife. 2023 Feb 1;12:e84155. doi: 10.7554/eLife.84155 (PMC9925049; doi:10.7554/eLife.84155)
Supplement: Figure 4—figure supplement 1—source data 1. [file elife-84155-fig4-figsupp1-data1.xlsx]

## Sheet: Sheet1
Left		PCD1
		WT						rep1						Comparisons	p value (two-tailed Student’s t-test, unpaired)
		Column	REP1	REP2	REP3	SD		Column	REP1	REP2	REP3	SD		Column A VS C		0.001
	Gal	A	0.5	0.463294	0.417544	0.0413106		C	0.76313	0.692555	0.742262	0.0362562		Column B VS D		0.0073
	Gly	B	0.702222	0.737135	0.707107	0.0189053		D	0.82932	0.795536	0.864537	0.034503		Column E VS G		6.78e-05
														Column F VS H		0.3073
		ORF19.7357
		WT						rep1
		Column	REP1	REP2	REP3	SD		Column	REP1	REP2	REP3	SD
	Gal	E	0.161544	0.150726	0.183011	0.0164326		G	1.1487	1.01396	1.19748	0.0950559
	Gly	F	0.528509	0.60698	0.503478	0.0540014		H	0.554785	0.674349	0.578344	0.0633345
Right		DAC1
		WT						rep1						Comparisons	p value (two-tailed Student’s t-test, unpaired)
		Column	REP1	REP2	REP3	SD		Column	REP1	REP2	REP3	SD		Column I VS K		9.69e-05
	Gal	I	0.059129	0.057912	0.049378	0.00531338		K	0.00588	0.007705	0.006479	0.000930278		Column J VS L		0.1062
	Gly	J	0.015198	0.014782	0.013602	0.000827916		L	0.009549	0.013291	0.012821	0.00203836		Column M VS O		0.0006
														Column N VS P		0.0144
		NAG1												Column Q VS S		0.0002
		WT						rep1						Column Y VS A1		0.0026
		Column	REP1	REP2	REP3	SD		Column	REP1	REP2	REP3	SD		Column Z VS B1		0.0309
	Gal	M	0.064704	0.081334	0.063813	0.00986861		O	0.011924	0.013985	0.011679	0.00126658		Column C1 VS D1		0.0009
	Gly	N	0.008609	0.009958	0.009486	0.000684558		P	0.00719	0.007839	0.006759	0.000543655
		FGR13
		WT						rep1
		Column	REP1	REP2	REP3	SD		Column	REP1	REP2	REP3	SD
	Gal	Q	0.002507	0.003151	0.002631	0.00034169		S	0.022561	0.019237	0.018841	0.00204304
	Gly	R	0.009618	0.009958	0.009685	0.000180101		T	0.011652	0.006813	0.008431	0.00246335
		DAL81
		WT						rep1
		Column	REP1	REP2	REP3	SD		Column	REP1	REP2	REP3	SD
	Gal	U	0.009486	0.010669	0.00842	0.00112501		W	0.018064	0.015843	0.016176	0.00119779
	Gly	V	0.009099	0.008144	0.008851	0.000495543		X	0.012259	0.011359	0.01243	0.000575367
		ASG1
		WT						rep1
		Column	REP1	REP2	REP3	SD		Column	REP1	REP2	REP3	SD
	Gal	Y	0.063372	0.057912	0.064257	0.00343642		A1	0.090873	0.08362	0.081334	0.00498037
	Gly	Z	0.061505	0.077482	0.060873	0.00941207		B1	0.08362	0.08362	0.090873	0.00418752
		HRR25
		WT						rep1
		Column	REP1	REP2	REP3	SD		Column	REP1	REP2	REP3	SD
	Gal	C1	0.016863	0.015625	0.015517	0.000747889		D1	0.035897	0.029564	0.032129	0.00318549
	Gly	C2	0.006434	0.007546	0.006992	0.000556001		D2	0.00982	0.011359	0.010167	0.000807237
