# Supplementary material for: Recognition of galactose by a scaffold protein recruits a transcriptional activator for the GAL regulon induction in Candida albicans
Source: eLife. 2023 Feb 1;12:e84155. doi: 10.7554/eLife.84155 (PMC9925049; doi:10.7554/eLife.84155)
Supplement: Figure 4—figure supplement 2—source data 1. [file elife-84155-fig4-figsupp2-data1.xlsx]

## Sheet: Figure 4-figure supplement 2 B
Left
	Column	REP1	REP2	REP3	SD			Comparisons	p value (two-tailed Student’s t-test, unpaired)
Vector	A	1.31951	1.1487	1.20581	0.0869533			Column A VS B		6.04187e-05
CtREP1	B	7.56846	6.58873	6.63456	0.552895			Column A VS C		0.0036
CpREP1	C	4.92458	5.38893	7.4127	1.323			Column A VS D		9.33457e-05
CaREP1	D	9.00047	7.6211	9.00047	0.796376			Column B VS D		0.0452
								Column C VS D		0.0419
Right	Column	REP1	REP2	REP3	SD			Comparisons	p value (two-tailed Student’s t-test, unpaired)
Vector	E	1.21419	0.939523	0.817902	0.203013			Column E VS F		0.0011
CtREP1	F	5.85634	4.25748	5.50217	0.839746			Column E VS G		0.0009
CpREP1	G	3.86375	4.59479	5.20537	0.671712			Column E VS H		5.69202e-05
CaREP1	H	7.06162	6.06287	6.63456	0.501121			Column F VS H		0.0707
								Column G VS H		0.0137

## Sheet: Figure 4-figure supplement 2 D
Left
	Column	REP1	REP2	REP3	SD			Comparisons	p value (two-tailed Student’s t-test, unpaired)
Vector	A	1.10957	1.25701	1.22264	0.077143			Column A VS B		0.00826378
CtCGA1	B	6.10504	8.63383	11.4716	2.68478			Column A VS C		1.57557e-05
CpCGA1	C	8.11168	8.57419	7.6211	0.476611			Column A VS D		0.0001
CaCGA1	D	6.9163	7.88986	6.63456	0.65866			Column B VS D		0.3755
								Column C VS D		0.1115
Right	Column	REP1	REP2	REP3	SD			Comparisons	p value (two-tailed Student’s t-test, unpaired)
Vector	E	1.02811	1.21419	1.06437	0.0986477			Column E VS F		0.001
CtCGA1	F	5.81589	8.1681	7.1602	1.18011			Column E VS G		7.16199e-06
CpCGA1	G	6.1475	6.45313	6.72717	0.289978			Column E VS H		6.7629e-05
CaCGA1	H	5.06303	4.89056	5.65685	0.401991			Column F VS H		0.0123
								Column G VS H		0.0625
