# Supplementary material for: Recognition of galactose by a scaffold protein recruits a transcriptional activator for the GAL regulon induction in Candida albicans
Source: eLife. 2023 Feb 1;12:e84155. doi: 10.7554/eLife.84155 (PMC9925049; doi:10.7554/eLife.84155)
Supplement: Figure 4—source data 1. [file elife-84155-fig4-data1.xlsx]

## Sheet: Sheet1
Left
			Gly							Glc
			Column	REP1	REP2	REP3	SD			Column	REP1	REP2	REP3	SD
		Rep1	A	0.469761	0.864537	0.432269	0.239482		Rep1	E	15.7797	18.2522	13.1775	2.53766
		Rep1ΔAD	B	5.65685	4.31691	5.65685	0.773615		Rep1ΔAD	F	8.63383	6.58873	5.77572	1.47265
		Vector	C	4.53154	3.45815	2.71321	0.914094		Vector	G	5.61778	3.09513	6.10504	1.61559
		ngs1	D	6.49802	3.70635	5.9794	1.48487		ngs1	H	4.82323	2.8481	5.09824	1.22746
							Comparisons	p value (two-tailed Student’s t-test, unpaired)
							Column A VS E		0.0005
							Column B VS F		0.1359
							Column C VS G		0.2698
							Column D VS H		0.3641
							Column E VS F		0.0067
							Column E VS G		0.0034
							Column E VS H		0.0021
Right
			Gly							Glc
			Column	REP1	REP2	REP3	SD			Column	REP1	REP2	REP3	SD
		Rep1	I	0.366021	0.646176	0.400535	0.152762		Rep1	M	9.78112	12.6407	11.2356	1.42984
		Rep1ΔAD	J	4.82323	3.81055	5.27803	0.751206		Rep1ΔAD	N	4.5801	3.36199	2.90795	0.864683
		Vector	K	2.28153	1.85318	1.91853	0.230768		Vector	O	3.38698	1.98618	3.70635	0.914987
		ngs1	L	3.90795	3.15846	3.69447	0.386138		ngs1	P	3.75683	4.75683	5.16941	0.726363
							Comparisons	p value (two-tailed Student’s t-test, unpaired)
							Column I VS M		0.0002
							Column J VS N		0.1976
							Column K VS O		0.1377
							Column L VS P		0.1096
							Column M VS N		0.0014
							Column M VS O		0.0011
							Column M VS P		0.002
